# Supplementary material for: Structure-Function Relationships of the Vertebral Endplate
Source: bioRxiv or medRxiv preprint supplement (doi:10.1101/2021.05.14.444250), 2021-05-17
Supplement: Supplementary file [file media-1.pdf]

## SUPPORTING INFORMATIONS

To measure the plate thickness, the binarized  $\mu$ CT images were pre-processed with MATLAB built-in function, `imfill` (R2020a, MathWorks, Natick, Massachusetts, USA) to fill the pores, presented in each 2D images.

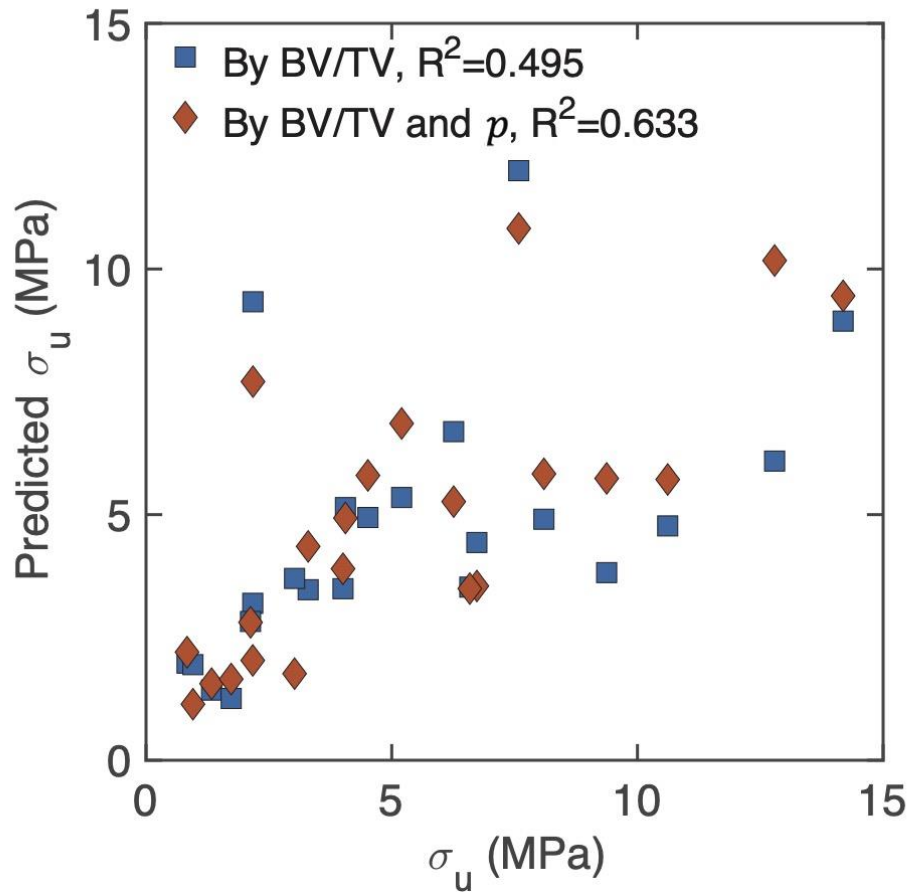

FIGURE S1,  $\sigma_u$  predicted by using BV/TV only and by BV/TV together with  $p$ . Adding  $p$  to the regression was able to explain more of the variations in  $\sigma_u$

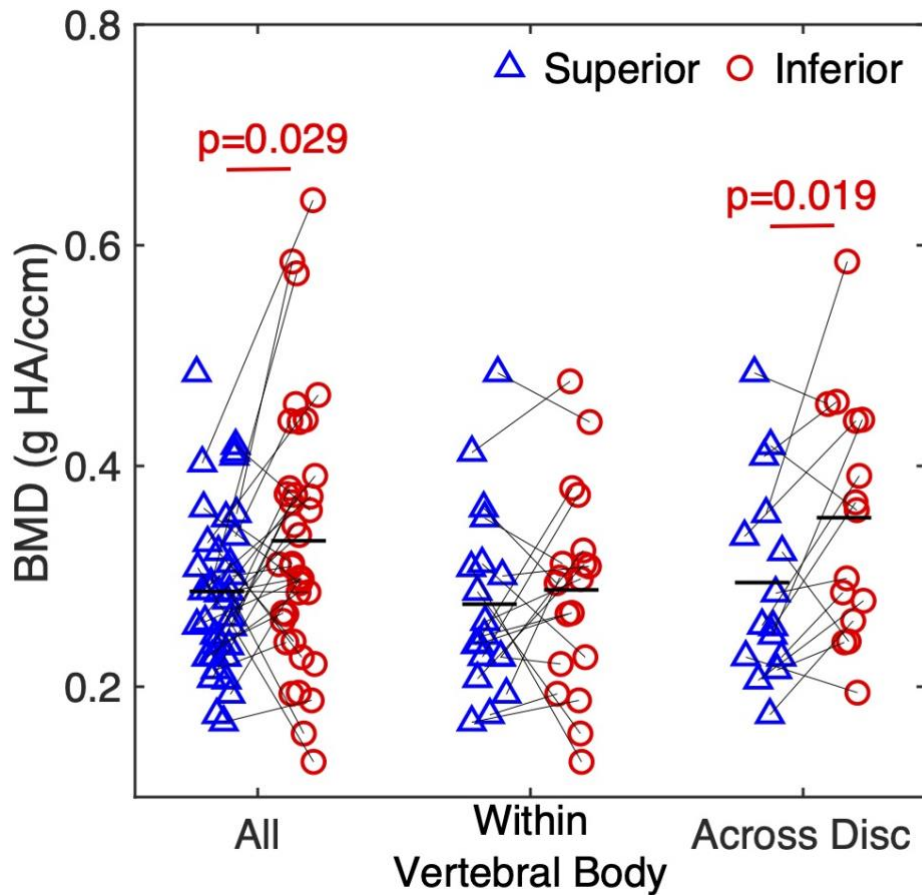

FIGURE S2, Comparison of BMD between superior and inferior vertebral endplates. When compared across the disc using a paired t-test, or when compared in an unpaired manner, BMD is higher in the inferior vertebral endplates. However, when compared within the vertebral body using a paired t-test, no difference was found
